# Supplementary material for: Theoretical insights into the methane catalytic decomposition on graphene nanoribbons edges
Source: PubMed Central journal article supplement (PMC10267404; doi:10.3389/fchem.2023.1172687), 2023-06-01
Supplement: DataSheet1.pdf [file DataSheet1.pdf]

## Supplementary Material

**Table S1.** Adsorption energy for the d-CH<sub>4</sub>, u-CH<sub>4</sub>, t-CH<sub>4</sub> and u-CH<sub>4</sub>-IP, obtained at the PBE-TS level ( $E_{ads,TS}$ ), PBE-MBD level ( $E_{ads,MBD}$ ) and their energetic difference ( $\Delta E_{ads}$ ). Equilibrium distance between methane and the Z1 adsorption site, obtained at the PBE-TS level ( $D_{e,TS}$ ), PBE-MBD level ( $D_{e,MBD}$ ) and their difference ( $\Delta D_e$ ).

|                       | $E_{ads,TS}$ (eV) | $E_{ads,MBD}$ (eV) | $\Delta E_{ads}$ | $D_{e,TS}$ | $D_{e,MBD}$ | $\Delta D_e$ |
|-----------------------|-------------------|--------------------|------------------|------------|-------------|--------------|
| d-CH <sub>4</sub>     | -0.089            | -0.070             | 0.019            | 2.750      | 2.960       | 0.210        |
| u-CH <sub>4</sub>     | -0.120            | -0.089             | 0.032            | 3.510      | 3.790       | 0.280        |
| t-CH <sub>4</sub>     | -0.113            | -0.072             | 0.041            | 3.610      | 3.950       | 0.340        |
| u-CH <sub>4</sub> -IP | -0.073            | -0.070             | 0.003            | 2.810      | 2.800       | -0.010       |

**Table S2.** Adsorption energies in eV for different orientations of CH<sub>4</sub> on Z1, Z2, Z3 and Z4 sites on the 12-ZGNR.

|                   | Z1     | Z2     | Z3     | Z4     |
|-------------------|--------|--------|--------|--------|
| u-CH <sub>4</sub> | -0.120 | -0.136 | -0.180 | -0.186 |
| d-CH <sub>4</sub> | -0.089 | -0.115 | -0.133 | -0.136 |
| t-CH <sub>4</sub> | -0.113 | -0.140 | -0.177 | -0.180 |

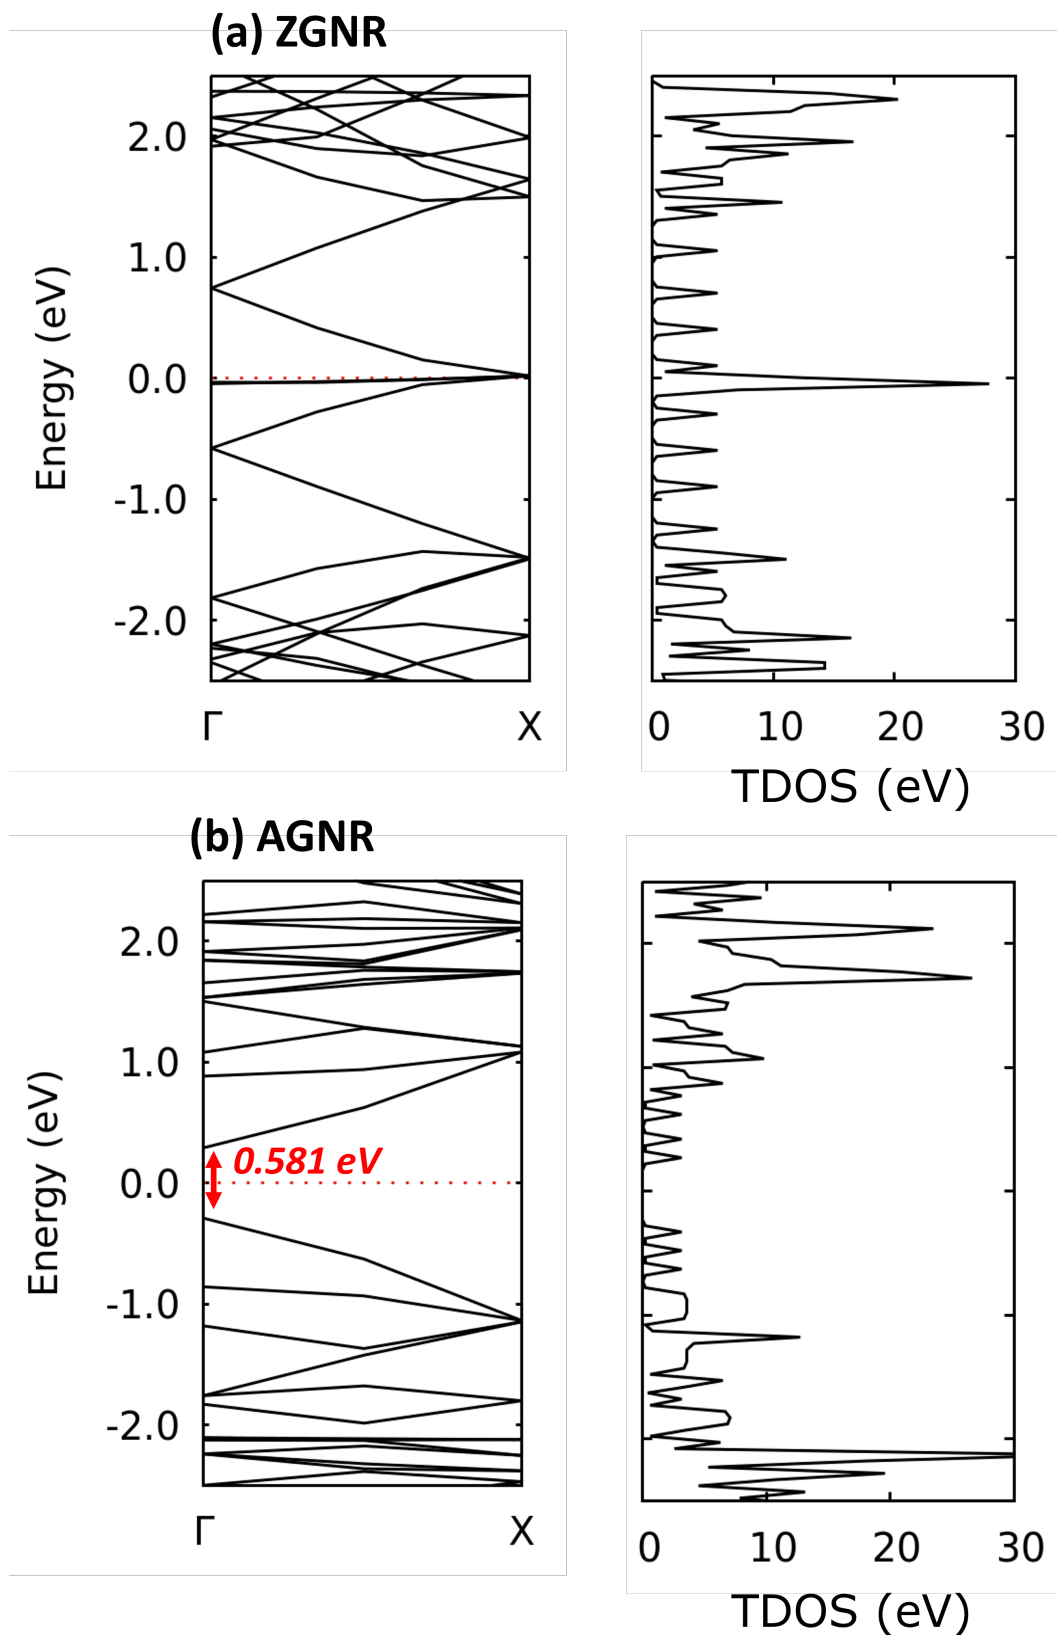

**Figure S1.** Band structure (left) and total density of states (right) of (a) pristine 12-ZGNR and (b) pristine 12-AGNR. A uniform ( $10 \times 1 \times 1$ ) k-point sampling grid was adopted for the band structure calculations

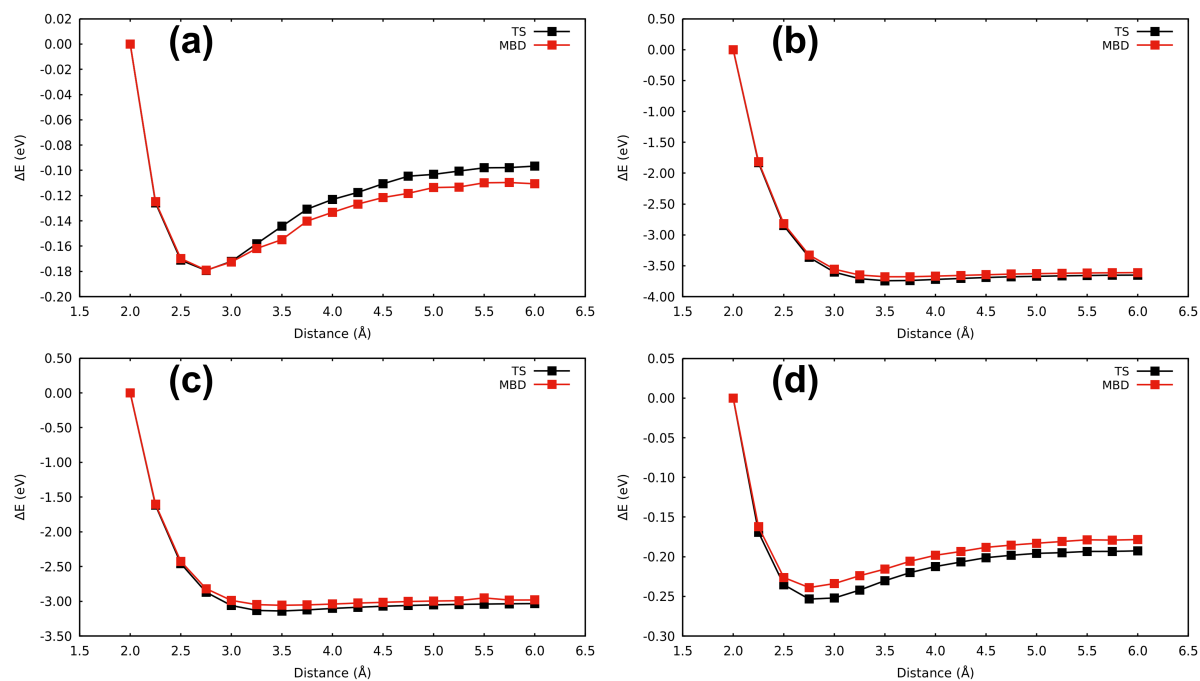

**Figure S2.** Potential energy surface as a function from the CH<sub>4</sub> distance from the Z1 adsorption site on 12-ZGNR, adopting the TS and MBD dispersion corrections. The PES were constructed in respect to the (a) d-CH<sub>4</sub> conformation; (b) t-CH<sub>4</sub> conformation; (c) u-CH<sub>4</sub> conformation physisorbed on Z1 site and (d) on the Z1-IP site.

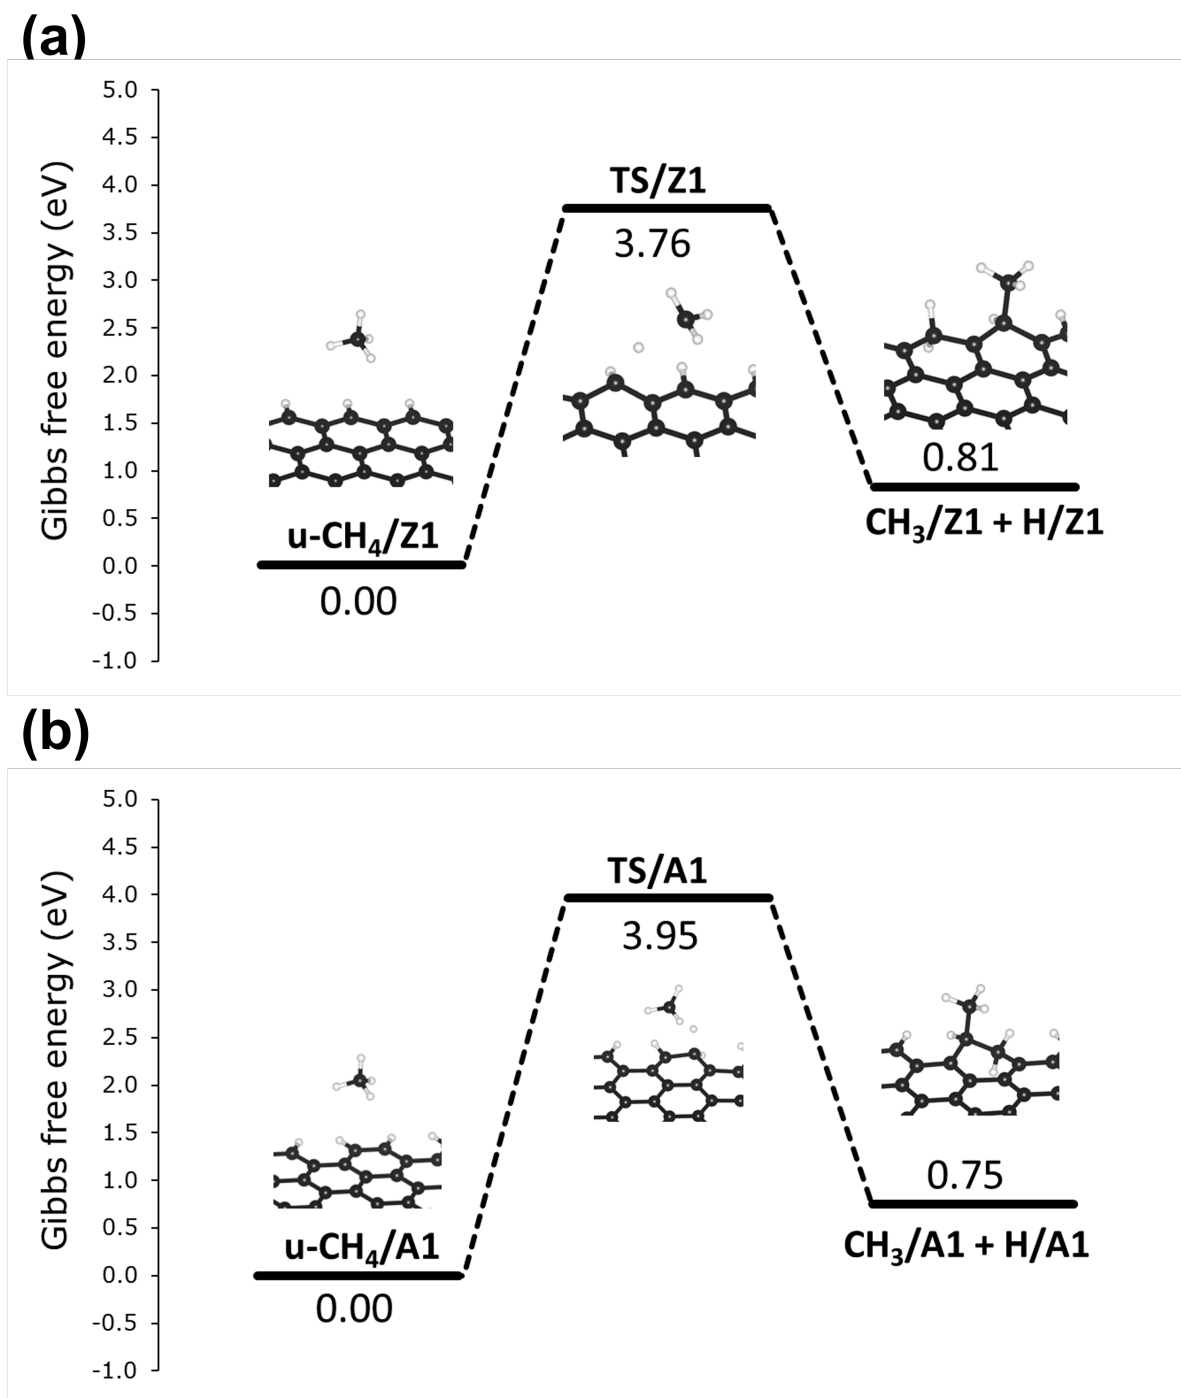

**Figure S3.** Gibbs free energy reaction profile of the u-CH<sub>4</sub> adsorption on the Z1 and A1 sites of the 12-ZGNR and 12-AGNR, respectively.

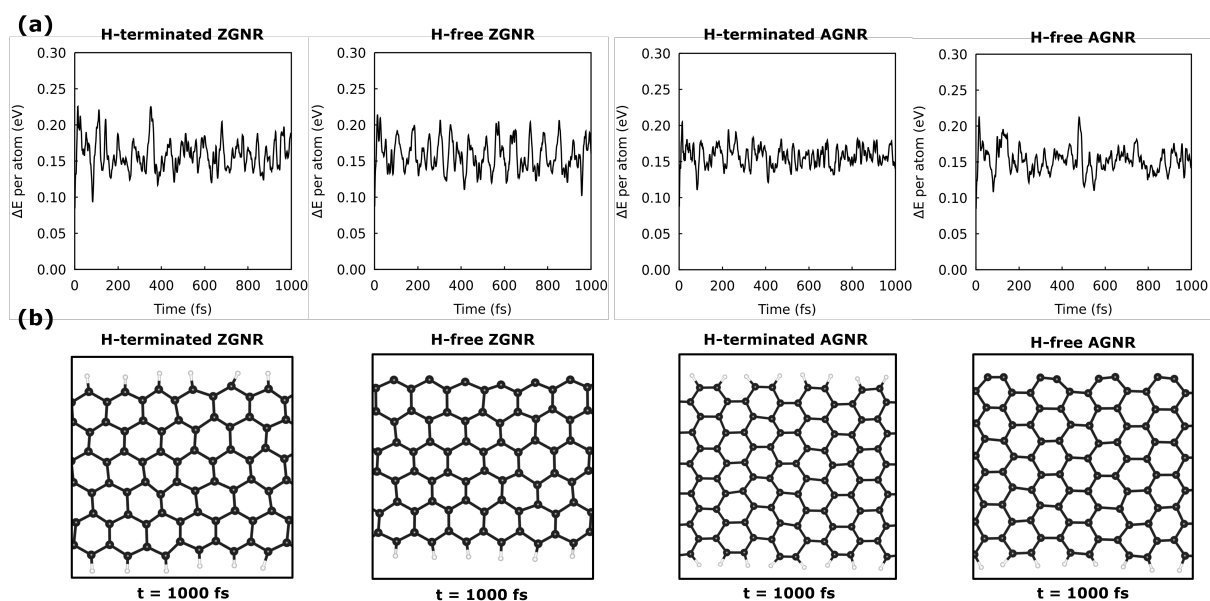

**Figure S4.** (a) Variation of electronic energy per atom, in respect to the minimum energy structure, against the time, upon AIMD simulations at 1200 K for the H-terminated and H-free ZGNR and AGNR (b) Snapshot of the each ZGNR and AGNR structures after 1000 fs simulation time.

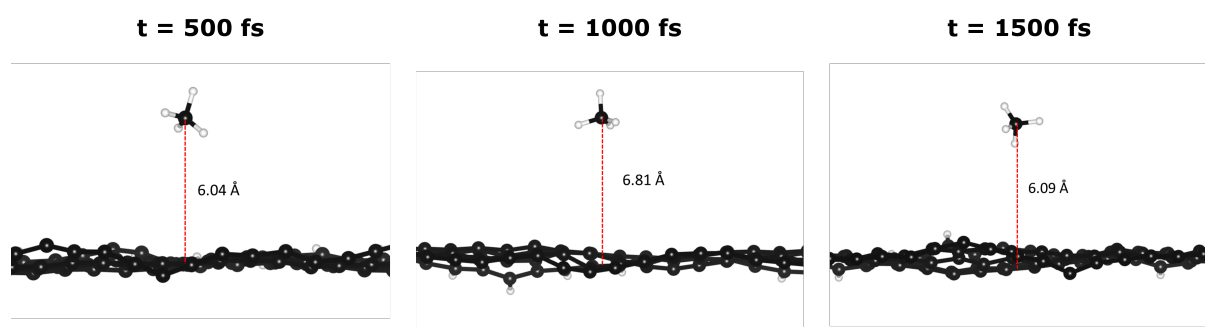

**Figure S5.** Snapshot of AIMD simulations of methane physisorbed on H-free ZGNR at 500 fs, 1000 fs and 1500 fs

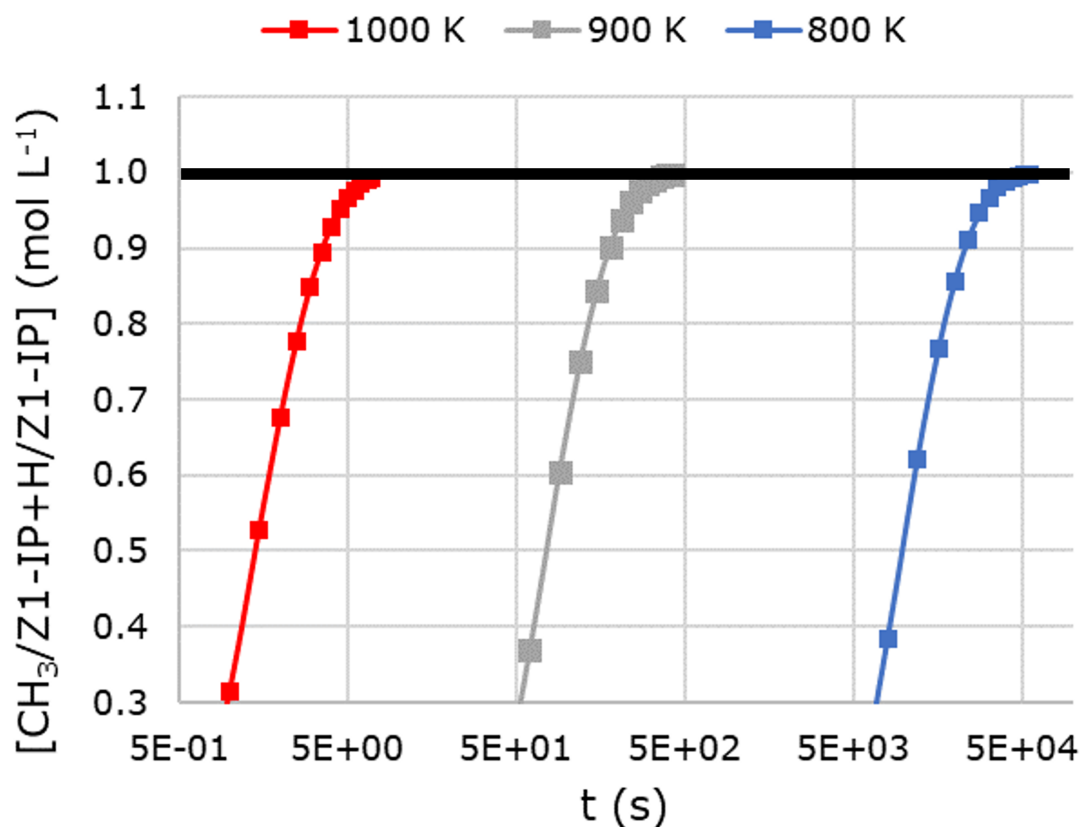

**Figure S6.** Concentration in mol L<sup>-1</sup> as a function of time of the most thermodynamic favourable chemisorption product, CH<sub>3</sub>/Z1 + H/Z1, from methane (u-CH<sub>4</sub>/Z2). Rate coefficients were obtained by means of the Transition State Theory, at the temperatures of 800 K, 900 K and 1000 K. The lattice-gas thermodynamic model was adopted in all calculations. Simulations were made considering the reaction mechanisms (ii) and (iii) of the main manuscript, i.e., we considered u-CH<sub>4</sub>/Z2 as the intermediate, and CH<sub>3</sub>-H/Z<sub>1</sub> and CH<sub>3</sub>/Z1 + H/Z1 as the initial and final states, respectively. Numerical simulations were done considering the steady-state approximation, in which  $d[u\text{-CH}_4/\text{Z2}]/dt \approx 0$ .
